# Supplementary material
Source: PubMed Central journal article supplement (PMC3731930)
Supplement: supp_blood-2013-01-480129_blood-2013-01-480129-1.pdf [file supp_blood-2013-01-480129_blood-2013-01-480129-1.pdf]

**Supplementary Figures**

**S1: AML blasts share the immunophenotype of MDSC and alter arginine metabolism.** **a)** Blood samples from newly-diagnosed AML patients were stained for a panel of surface markers. The whole blood profile (FSC and SSC) and expression of surface markers is shown (histograms) for one representative patient. Red line = Fluorochrome conjugated antibody; Black line = Isotype control. **b)** Arginase II and iNOS expression was determined by RT-PCR. Representative data from nine patients are shown. GAPDH was used as the housekeeping gene to ensure equal loading **c)** Whole cell lysates of AML blasts from 10 patients, or monocytes and neutrophils from healthy donors were tested for the ability to convert arginine into urea using a colorimetric assay. Arginase activity is found for AML blasts but not myeloid cells from healthy donors. **d)** No correlation between arginase activity of AML blast lysate as measured by colorimetric assay, and intracellular arginase II concentration measured by ELISA ( $p=0.29$ ).

**S2: Arginase I is not raised in the plasma of AML patients compared to healthy controls.** **a)** Plasma from 15 AML patients and 15 healthy controls was analysed by ELISA for arginase I ( $p=0.03$ ). **b)** The arginase activity in plasma from 2 patients decreases towards normal levels after 1 cycle of chemotherapy ( $p=0.04$ ).

**S3. CD206<sup>+</sup> monocytes suppress T cell proliferation.** CD206<sup>+</sup> monocytes generated from 48 hour culture in AML patient plasma, significantly suppress T cell proliferation in MLR compared to monocytes cultured in the plasma of healthy patients. (\*\*\*) $p=0.0001$

**S4. Human CD34<sup>+</sup> HSCs cultured with AML plasma retain colony-forming potential.** **a)** Human CD34<sup>+</sup> HSCs previously cultured for 3 days in either AML plasma or with AML plasma containing L-NMMA or NOHA, or healthy plasma, were transferred to a methylcellulose gel. Colony-formation was assessed after 7 days using an inverted microscope. (colony-forming units: AML plasma vs. AML plasma with inhibitors, \*\* p=0.029; AML plasma vs. healthy donor plasma, \*\*\*p=0.0007) **b)** Human CD34<sup>+</sup> HSCs maintain CD34 expression in the presence of AML patient plasma. HSCs were cultured in the presence of AML plasma, AML plasma with L-NMMA or NOHA, or healthy plasma. CD34<sup>+</sup> expression was assessed on Day 3 of culture by flow cytometry. Data from three separate experiments are shown. (AML plasma vs. AML plasma with inhibitors, \* p=0.027; AML plasma vs. healthy donor plasma, \*\*\*p=0.0002)

### **Supplementary Table**

#### **S Table 1. Table of patients' characteristics**

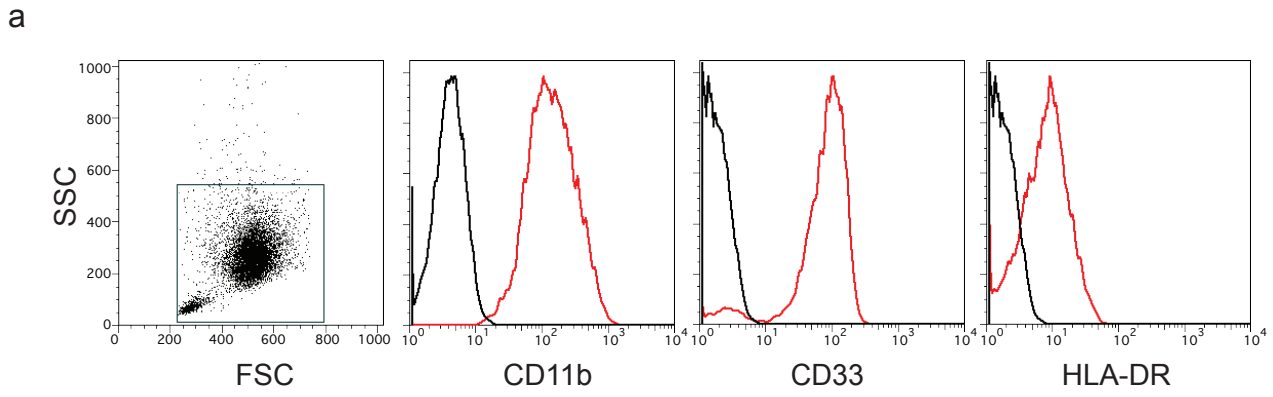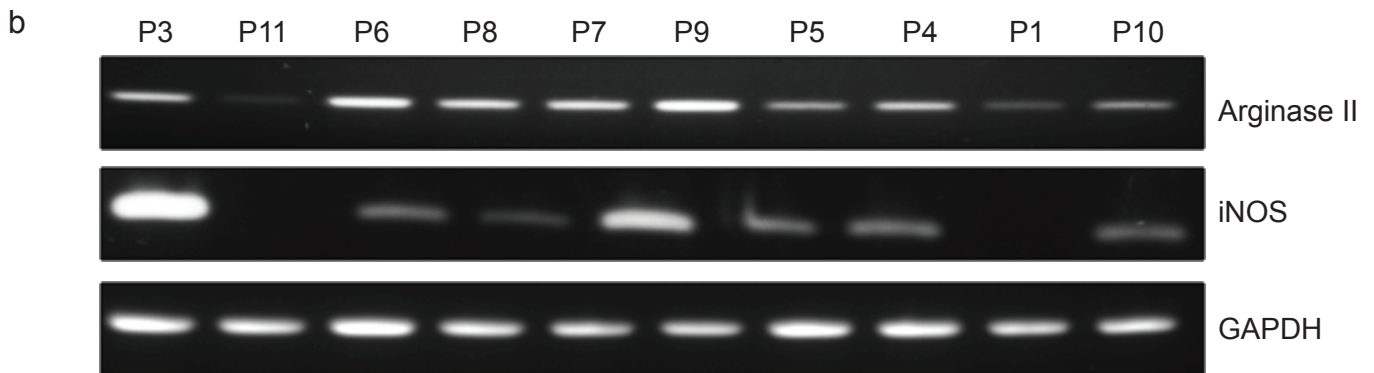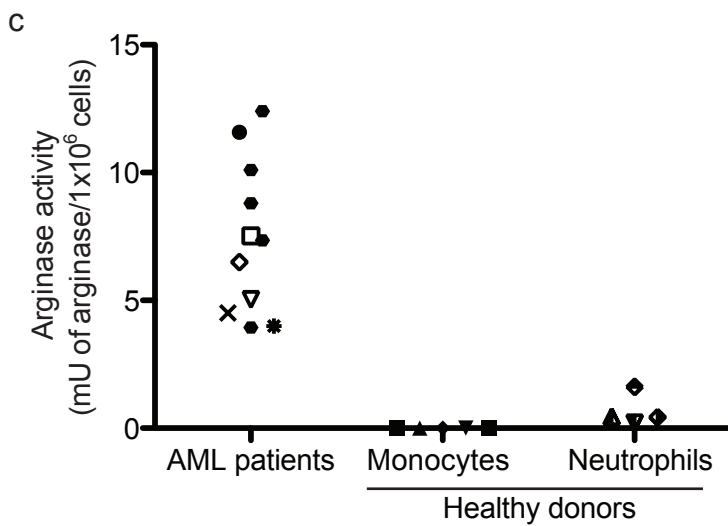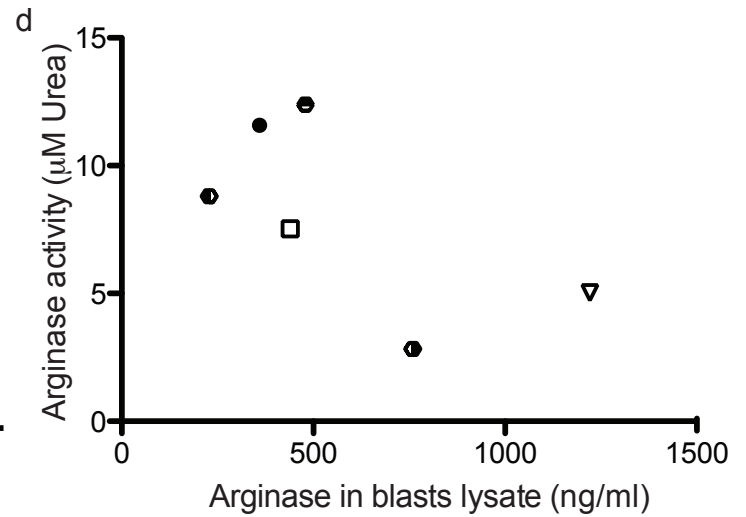

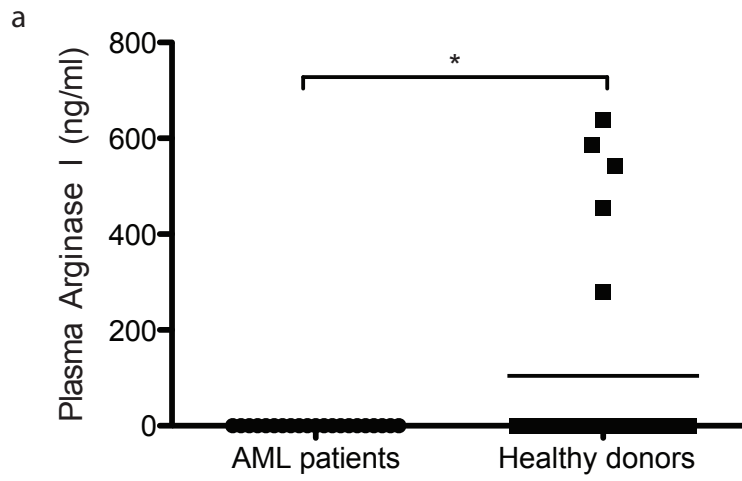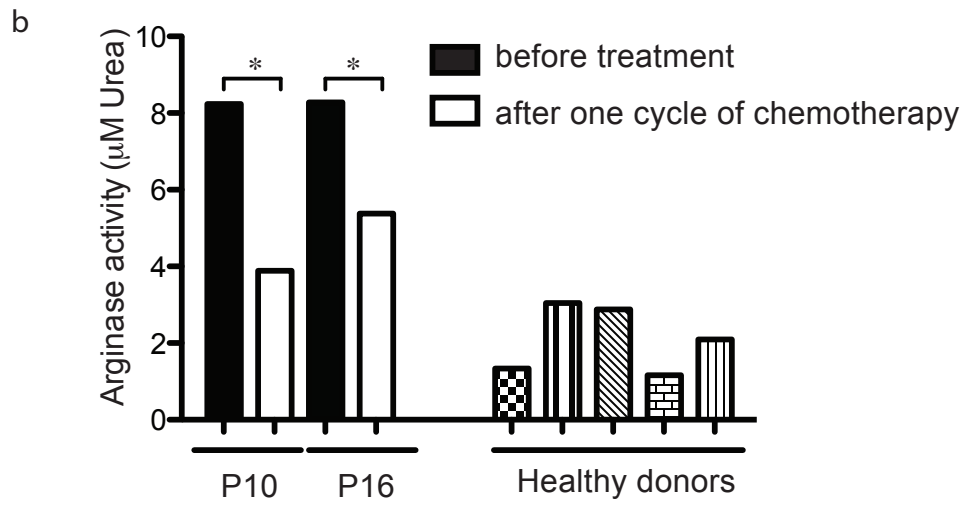

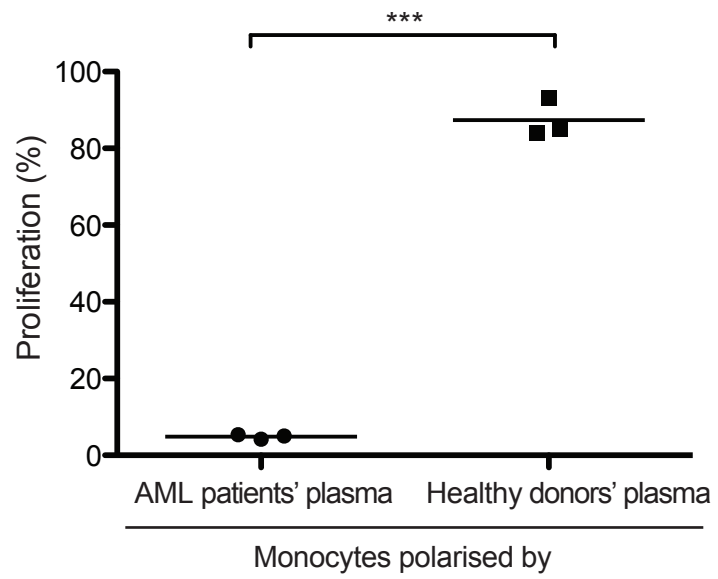

Supplementary Figure 3

a

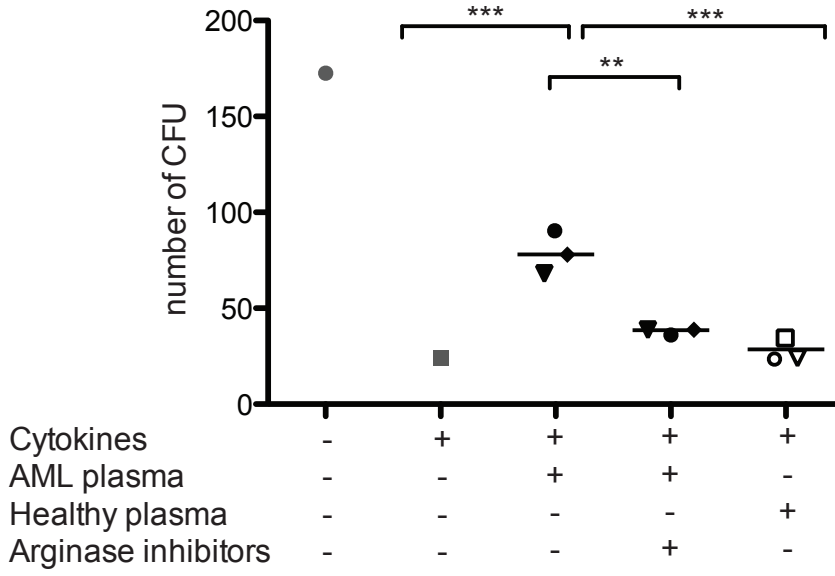

b

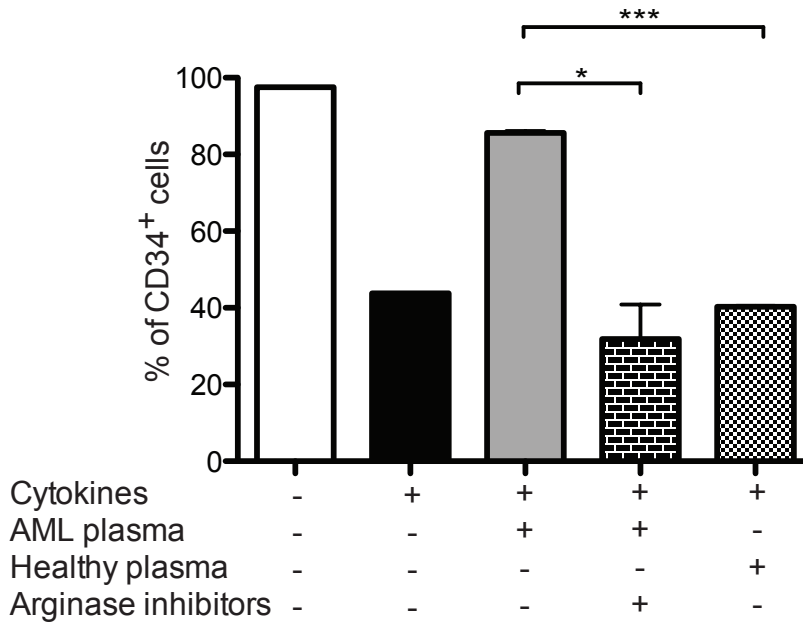

| Patient | Sample origin | Timing    | Sex | Age | Diagnostic white cell count (x10 <sup>3</sup> /uL) | Cytogenetics                                    | FAB           | Immunophenotype                                                      |
|---------|---------------|-----------|-----|-----|----------------------------------------------------|-------------------------------------------------|---------------|----------------------------------------------------------------------|
| P1      | Blood         | Diagnosis | F   | 3   | 338                                                | 49,6,+8,+8,t(10;13;11)(p13;q14;q23)[9]/46,XX[1] | M5            | CD11b+/CD33+/CD14(12%)/CD34-                                         |
| P2      | Blood         | Diagnosis | M   | 44  | 246                                                | Normal                                          | M4            | CD11b+/CD33+/CD34-/CD15+(15%)                                        |
| P3      | Blood         | Diagnosis | F   | 77  | 2.6                                                | Normal                                          | M5            | CD11b+/CD33+/CD14+/CD34-/ CD117+/ CD64+                              |
| P4      | Blood         | Diagnosis | F   | 64  | 3.1                                                | Normal                                          | M5            | CD11b+/CD34+/CD33+/CD38+/CD15+(30%)/CD7+(40%)/CD11b+                 |
| P5      | Blood         | Diagnosis | F   | 89  | 5.7                                                | Normal                                          | M1            | CD11b+/CD34+/CD33+(30%)                                              |
| P6      | Blood         | Diagnosis | F   | 88  | 1.3                                                | Normal                                          | M0-1          | CD11b+/CD34+/CD33-                                                   |
| P7      | Blood         | Diagnosis | F   | 13  | 37                                                 | MLL, t(9;11)                                    | M4            | CD11b+/CD33+/CD15+(65%)/CD19+/CD117+/ NG2+                           |
| P8      | Blood         | Diagnosis | F   | 26  | 5.0                                                | 46XX, t(5;17)                                   | M3            | CD11b+/CD33+/CD34-                                                   |
| P9      | Blood         | Diagnosis | F   | 58  | 76                                                 | Normal                                          | M5            | CD11b+/CD34+/CD15+/CD33+/CD38+/CD71+/CD117+                          |
| P10     | Blood         | Diagnosis | F   | 3   | 30                                                 | Constitutional +21, GATA-1+                     | M7            | CD11b+/CD33+/MPO+/ CD41-/CD117+/CD34+/GLYA-/CD10+/CD19+              |
| P11     | Blood         | Diagnosis | M   | 39  | 185                                                | Normal                                          | M4Eo          | CD11b+/CD33+/CD15+(22%)/CD34-                                        |
| P12     | Blood         | Diagnosis | M   | 80  | 7                                                  | Normal                                          | CMML          | CD11b+/CD34+/CD33+                                                   |
| P13     | Blood         | Diagnosis | F   | 68  | 47.2                                               | Normal                                          | M5            | CD34+/CD117+/CD14+/CD64+/CD300e+/CD11b+/CD15+/CD16+                  |
| P14     | Blood         | Diagnosis | F   | 56  | 166                                                | Normal                                          | M4            | CD11b+/CD33+/CD34+                                                   |
| P15     | Blood         | Diagnosis | F   | 27  | 10.4                                               | Normal                                          | Mixed Lineage | CD34+ (10%) of which 50% MPO; CD13+/CD33+(60%); CD7+/CD2+/TdT+ (50%) |

Supplementary Table 1
